# Supplementary material for: SDC/OS-LDH composite for highly sensitive fluorescence detection of Fe3+ at a much lower concentration
Source: Royal Society of Chemistry journal article supplement (doi:10.1039/d0dt01873b), 2020-01-01
Supplement: d0dt01873b1.pdf [file d0dt01873b1.pdf]

## Electronic Supplementary Information

### SDC/OS-LDH composite for highly sensitive fluorescence detection of Fe<sup>3+</sup> at much low concentration

Rong Guo,<sup>a</sup> Jian Li,<sup>b,\*</sup> Lihong Chen,<sup>a</sup> Zihuan Yu,<sup>a</sup> Huiqin Yao,<sup>c,\*</sup> Keren Shi,<sup>d</sup>

Cuiqing Li,<sup>e,\*</sup> Shulan Ma<sup>a,\*</sup>

<sup>a</sup>*Beijing Key Laboratory of Energy Conversion and Storage Materials, College of Chemistry, Beijing Normal University, Beijing 100875, China. E-mail: mashulan@bnu.edu.cn.*

<sup>b</sup>*Chemistry & Chemical and Environmental Engineering College, Weifang University, Weifang 261061, China. E-mail: ljwfu@163.com.*

<sup>c</sup>*School of Basic Medical Sciences, Ningxia Medical University, Yinchuan 750004, China. E-mail: huiqin\_yao@163.com.*

<sup>d</sup>*State Key Laboratory of High-efficiency Utilization of Coal and Green Chemical Engineering, Ningxia University, Yinchuan 750021, China.*

<sup>e</sup>*Department of Chemical Engineering, Beijing Institute of Petrochemical Technology, Beijing 102617, China. E-mail: licuiqing@bipt.edu.cn*

## Materials and Apparatus

4,4'-Stilbenedicarboxylic acid (SDC, 96%) was purchased from Aladdin Industrial Corporation. Sodium 1-Octanesulfonate (OS, 96%) was purchased from purchased from HWRK Chemical Co., Ltd.  $\text{Fe}(\text{NO}_3)_3$  was purchased from Shanghai Macklin Biochemical Co., Ltd.  $\text{Zn}(\text{NO}_3)_2$  was purchased from Tianjin Kemiou Chemical Reagent Co., Ltd.  $\text{Mg}(\text{NO}_3)_2$  (AR),  $\text{NaNO}_3$  (AR),  $\text{HNO}_3$  (AR), Hexamethylenetetramine (HMT) were from Xilong Scientific Co., Ltd.  $\text{Al}(\text{NO}_3)_3$  (AR),  $\text{Cr}(\text{NO}_3)_3$  (AR) were purchased from Sinopharm Chemical Reagent Co., Ltd.  $\text{Cu}(\text{NO}_3)_2$  (C.P.),  $\text{NaOH}$  (AR) were purchased from Beijing Chemical Co. Limited.

The X-ray diffraction (XRD) patterns of solid samples were collected using a PANalytical X'pert Pro MPD diffractometer with  $\text{Cu K}\alpha$  radiation at room temperature, step size of  $0.033^\circ$ , scan time of 20 s per step, and  $2\theta$  ranging from  $4.5$  to  $70^\circ$ . In the small-angle X-ray diffraction, XRD patterns were obtained with the same step size and scan time of large degrees, and  $2\theta$  ranging from  $0.6$  to  $6^\circ$ . The generator setting was 40 kV and 40 mA. The Field emission scanning electron microscopy (FESEM) morphology of LDHs and energy-dispersive spectroscopy (EDS) were observed on S-8010, Hitachi and XFlash 6160, Bruker, respectively. FTIR spectra of KBr disks were acquired using a Nicolet 380 Fourier Transform infrared spectrometer, 32 scans were collected at a resolution of  $1\text{ cm}^{-1}$  scanning from  $4000$ - $500\text{ cm}^{-1}$ . Fluorescence spectroscopy was performed using an Edinburgh FS5 spectrofluorimeter.

The metal concentrations were measured by inductively coupled plasma atomic emission spectroscopy (ICP-AES, Jarrel-ASH, ICAP-9000). C, H, and N elemental analyses were detected by Elementar vario EL elemental analyzer.

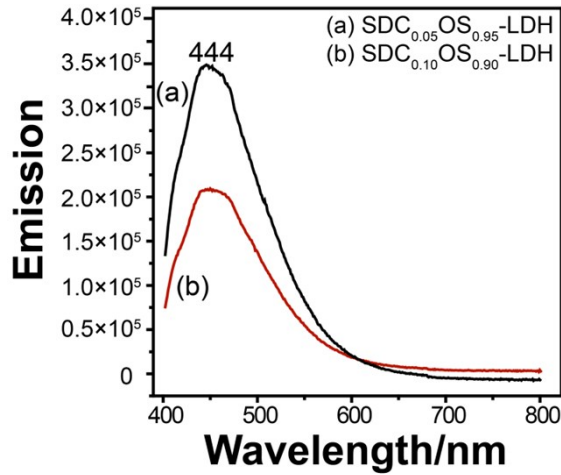

**Fig. S1.** Emission spectra of the colloidal suspensions in FM of (a)  $\text{SDC}_{0.05}\text{OS}_{0.95}\text{-LDH}$  and (b)  $\text{SDC}_{0.10}\text{OS}_{0.90}\text{-LDH}$  ( $\lambda_{\text{ex}} = 373 \text{ nm}$ ).

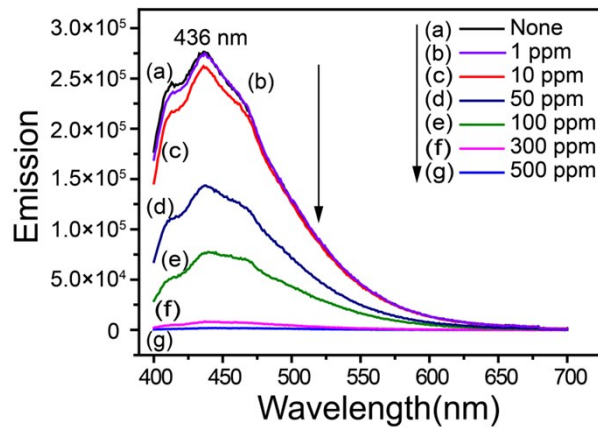

**Fig. S2.** Emission spectra of  $\text{SDC}_{0.05}\text{OS}_{0.95}\text{-LDH}$  suspension in FM with the addition of  $\text{Fe}^{3+}$  at concentrations of 0-500 ppm (3 ml composite colloid + 1 ml FM solutions of  $\text{Fe}^{3+}$ , which were prepared by dissolving the  $\text{Fe}(\text{NO}_3)_3$  in FM).

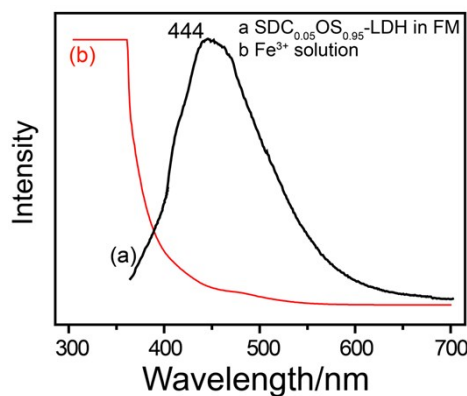

**Fig. S3.** Spectral overlap between the (a) emission spectra of  $\text{SDC}_{0.05}\text{OS}_{0.95}\text{-LDH}$  suspension in FM and (b) UV-Vis absorption spectra of  $\text{Fe}^{3+}$  solution.
